# Supplementary material for: Assessment of structural characteristics of regenerated cellulolytic enzyme lignin based on a mild DMSO/[Emim]OAc dissolution system from triploid of Populus tomentosa Carr.
Source: Royal Society of Chemistry journal article supplement (doi:10.1039/c6ra25663e), 2017-01-01
Supplement: c6ra25663e1.pdf [file c6ra25663e1.pdf]

### Electronic Supplementary Information

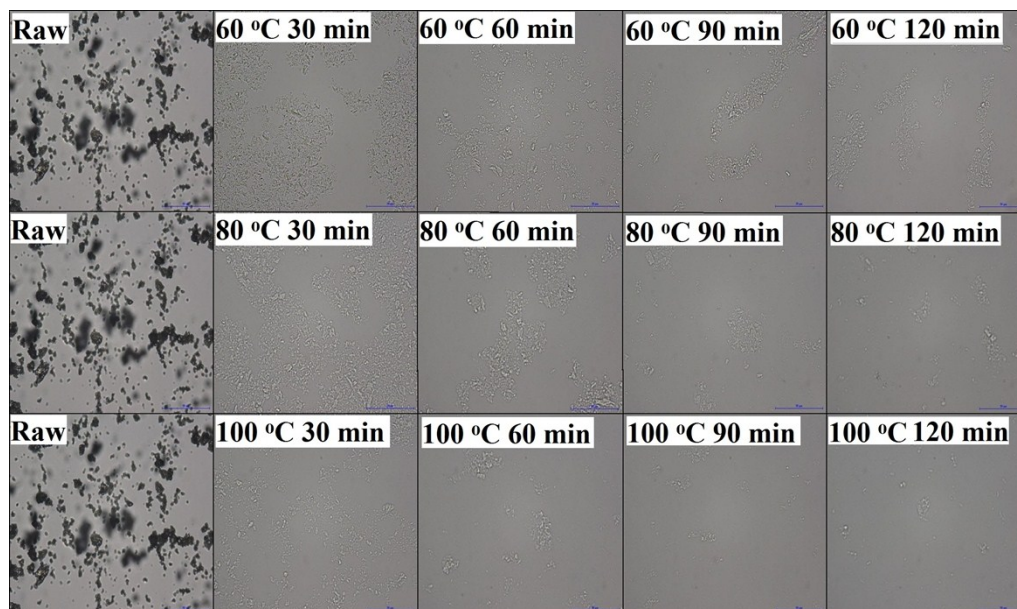

**Fig. S1.** Dissolution of ball-milled wood in DMSO/[Emin]OAc solvent system under different temperatures (Optical microscopy).

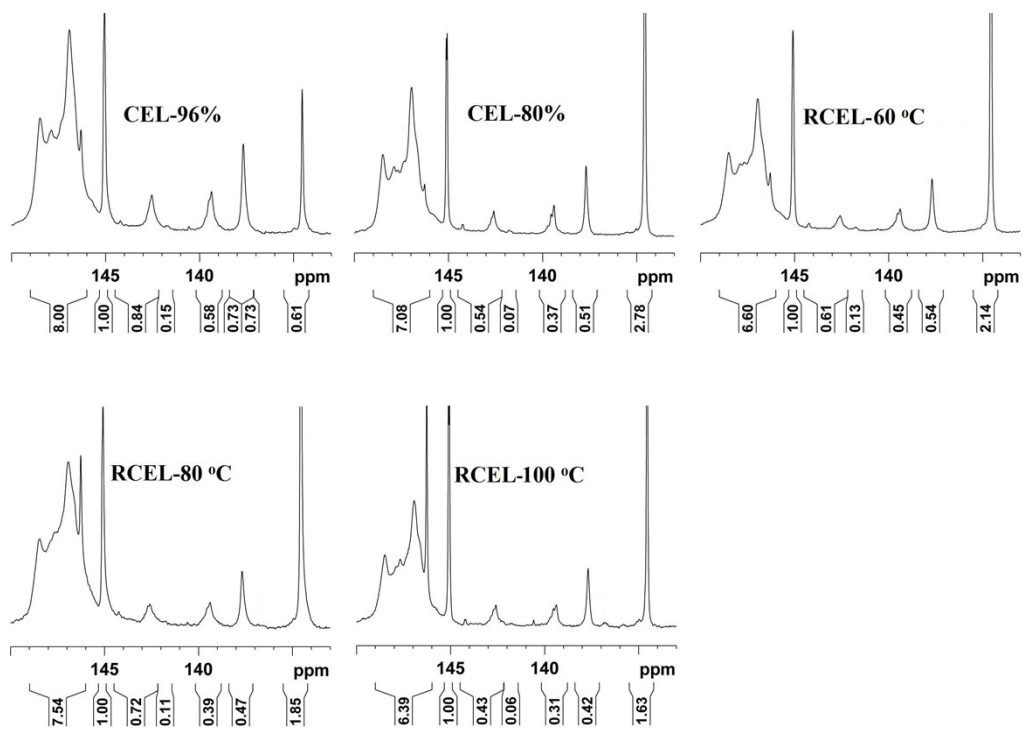

**Fig. S2.**  $^{31}\text{P}$ -NMR spectra of the lignin fractions isolated from poplar wood

**Table S1**Quantification of the raw and regenerated poplar wood by CP/MAS <sup>13</sup>C-NMR

| Samples      | Crystalline region | Amorphous region | CrI <sup>a</sup> (%) |
|--------------|--------------------|------------------|----------------------|
| Raw          | 1.00               | 4.08             | 19.68                |
| R-raw-60 °C  | 1.00               | 3.15             | 24.10                |
| R-raw-80 °C  | 1.00               | 2.81             | 26.26                |
| R-raw-100 °C | 1.00               | 3.68             | 21.36                |

<sup>a</sup> Crystallinity index

$$\text{CrI (\%)} = I_{\text{Crystalline region}} / I_{\text{Crystalline region} + \text{Amorphous region}}$$

**Table S2**

Assignments of  $^{13}\text{C}$ - $^1\text{H}$  correlation signals in the HSQC spectra of the lignin from poplar wood (according to the previous publications<sup>1-4</sup>).

| Labels                   | $\delta_{\text{C}}/\delta_{\text{H}}$ (ppm) | Assignment                                                                                                 |
|--------------------------|---------------------------------------------|------------------------------------------------------------------------------------------------------------|
| $\text{C}_{\beta}$       | 52.9/3.45                                   | $\text{C}_{\beta}$ - $\text{H}_{\beta}$ in phenylcomaran structures(C)                                     |
| $\text{B}_{\beta}$       | 53.5/3.05                                   | $\text{C}_{\beta}$ - $\text{H}_{\beta}$ in resinol substructures(B)                                        |
| - $\text{OCH}_3$         | 55.6/3.72                                   | C-H in methoxyls                                                                                           |
| $\text{A}_{\gamma}$      | 59.5/3.70 and 3.39                          | $\text{C}_{\gamma}$ - $\text{H}_{\gamma}$ in $\beta$ - $\text{O}$ -4' substructures(A)                     |
| $\text{D}_{\beta}$       | 59.7/2.73                                   | $\text{C}_{\beta}$ - $\text{H}_{\beta}$ in spirodienone substructures(D)                                   |
| $\text{I}_{\gamma}$      | 61.4/4.10                                   | $\text{C}_{\gamma}$ - $\text{H}_{\gamma}$ in cinnamyl(sinapyl/coniferyl) alcohol end groups(I)             |
| $\text{C}_{\gamma}$      | 62.3/3.73                                   | $\text{C}_{\gamma}$ - $\text{H}_{\gamma}$ in phenylcomaran structures(C)                                   |
| $\text{X}_5$             | 62.5/3.39                                   | $\text{C}_5$ - $\text{H}_5$ $\beta$ -D-xylopyranoside substructures(X)                                     |
| $\text{A}'_{\gamma}$     | 63.1/4.29                                   | $\text{C}_{\gamma}$ - $\text{H}_{\gamma}$ in $\gamma$ -acylated $\beta$ - $\text{O}$ -4' substructures(A') |
| $\text{B}_{\gamma}$      | 71.1/3.81 and 4.17                          | $\text{C}_{\gamma}$ - $\text{H}_{\gamma}$ in resinol substructures(B)                                      |
| $\text{A}_{\alpha}$      | 71.9/4.86                                   | $\text{C}_{\alpha}$ - $\text{H}_{\alpha}$ in $\beta$ - $\text{O}$ -4' substructures(A)                     |
| $\text{D}'_{\alpha}$     | 79.4/4.10                                   | $\text{C}_{\alpha}$ - $\text{H}_{\alpha}$ in spirodienone substructures(D')                                |
| BE                       | 81.0/4.65                                   | $\text{C}_{\alpha}$ - $\text{H}_{\alpha}$ in benzyl-ether (BE) linkage                                     |
| $\text{D}_{\alpha}$      | 81.1/5.09                                   | $\text{C}_{\alpha}$ - $\text{H}_{\alpha}$ in spirodienone substructures(D)                                 |
| $\text{A}_{\beta}$ (G/H) | 83.4/4.43                                   | $\text{C}_{\beta}$ - $\text{H}_{\beta}$ in $\beta$ - $\text{O}$ -4' linked to a G/H unit(A)                |
| $\text{B}_{\alpha}$      | 84.8/4.65                                   | $\text{C}_{\alpha}$ - $\text{H}_{\alpha}$ in resinol substructures(B)                                      |
| $\text{A}_{\beta}$ (S)   | 85.8/4.11                                   | $\text{C}_{\beta}$ - $\text{H}_{\beta}$ in $\beta$ - $\text{O}$ -4' linked to a S unit(A)                  |
| $\text{C}_{\alpha}$      | 86.79/5.46                                  | $\text{C}_{\alpha}$ - $\text{H}_{\alpha}$ in phenylcomaran structures(C)                                   |
| $\text{S}_{2,6}$         | 103.9/6.71                                  | $\text{C}_{2,6}$ - $\text{H}_{2,6}$ in syringyl units(S)                                                   |
| $\text{S}'_{2,6}$        | 106.2/7.32                                  | $\text{C}_{2,6}$ - $\text{H}_{2,6}$ in oxidized(C=O) phenolic syringyl units(S')                           |
| $\text{G}_2$             | 110.9/6.96                                  | $\text{C}_2$ - $\text{H}_2$ in guaiacyl units(G)                                                           |
| $\text{G}_5$             | 114.9/6.76                                  | $\text{C}_5$ - $\text{H}_5$ in guaiacyl units(G)                                                           |
| $\text{G}_6$             | 119.0/6.78                                  | $\text{C}_6$ - $\text{H}_6$ in guaiacyl units(G)                                                           |
| $\text{H}_{2,6}$         | 127.8/7.22                                  | $\text{C}_{2,6}$ - $\text{H}_{2,6}$ in <i>p</i> -hydroxyphenyl units(S)                                    |
| $\text{PB}_{2,6}$        | 131.2/7.66                                  | $\text{C}_{2,6}$ - $\text{H}_{2,6}$ in <i>p</i> -hydroxybenzoate units(S)                                  |

## Reference

- 1 S. Ralph, J. Ralph, L. Landucci and L. Landucci. *US Forest Prod. Lab., Madison, WI* (<http://ars.usda.gov/Services/docs.htm>). 2004.
- 2 H. Kim and J. Ralph. *Org. Biomol. Chem.* 2010,**8**,576-591.
- 3 J. C. Del Río, J. Rencoret, P. Prinsen, A. n. T. Martínez, J. Ralph and A. Gutiérrez. *J. Agric. Food Chem.* 2012,**60**,5922-5935.
- 4 T.-Q. Yuan, S.-N. Sun, F. Xu and R.-C. Sun. *J. Agric. Food Chem.* 2011,**59**,6605-6615.

## 2. Methods

### 2.1. Structure elucidation of CELs and RCELs

#### Acetylation of Lignin Samples

About 50 mg of CEL and RECL were dissolved in a solution of dimethyl sulfoxide: 1-methylimidazole (2:1, v/v) 3mL and stirred without direct light at room temperature for 12 h. Acetic anhydride (1 mL) was added to the reaction mixture and continued reacting for 2 h. The reaction mixture was dropped slowly into 100 mL acid water (pH=2) to induce precipitation followed by centrifugation. The acetylated lignin was dissolved in tetrahydrofuran (THF) (2 mg/mL), and the solution was filtered through a 0.22  $\mu\text{m}$  filter. The filtered solution (20  $\mu\text{L}$ ) was injected into the HPLC system and detected using an UV detector setting at 280 nm. THF was used as the mobile phase and the flow rate was 0.8 mL/min. Standard PL polystyrene samples were used for calibration. GPC analyses were run at least twice.

#### 2D-HSQC NMR

About 50 mg of lignin was dissolved in 0.5 mL of DMSO- $d_6$  (99.8% D). For quantitative 2D-HSQC spectra, the Bruker standard pulse program hsqcetgpsi2 was used for HSQC experiments. The spectral widths were 5000 Hz and 20000 Hz for the  $^1\text{H}$ - and  $^{13}\text{C}$ -dimensions, respectively. The number of collected complex points was 1024 for  $^1\text{H}$ -dimension with a recycle delay of 1.5 s. The number of transients was 64, and 256 time increments were always recorded in the  $^{13}\text{C}$ -dimension. The  $^1J_{\text{CH}}$  used was 145 Hz. Prior to Fourier transformation, the data matrixes were zero filled up to 1024 points in the  $^{13}\text{C}$ -dimension. Data processing was performed using standard Bruker Topspin-NMR software.

A quantitative analysis of the intensities of the HSQC cross-signal was performed according to the following formula: <sup>1-2</sup>

$$I(\text{C}_9) \text{ units} = 0.5I(\text{S}_{2,6}) + I(\text{G}_2)$$

Where  $I(\text{S}_{2,6})$  is the integration of  $\text{S}_{2,6}$ , including S and S',  $I(\text{G}_2)$  is the integral value of  $\text{G}_2$ .  $I(\text{C}_9)$  represents the integral value of the aromatic ring. According to the internal standard ( $I(\text{C}_9)$ ), the amount of  $I(\text{X})\%$  could be obtained by the following formula:

$$I(\text{X})\% = I(\text{X})/I(\text{C}_9) \times 100\%$$

Where  $I(\text{X})$  is the integral value of the  $\alpha$ -position of A ( $\beta$ -O-4'), B ( $\beta$ - $\beta$ ), and C ( $\beta$ -5), the integration should be in the same contour level.

In the aromatic region,  $\text{C}_{2,6}$ - $\text{H}_{2,6}$  correlations from S units and  $\text{C}_2$ - $\text{H}_2$  correlation from G units were used to estimate the S/G ratio of lignin. The S/G ratio could be obtained by the following formula:

$$\text{S/G} = 0.5I(\text{S}_{2,6})/I(\text{G}_2)$$

### **Quantitative <sup>31</sup>P NMR**

20 mg lignin was dissolved in 500  $\mu$ L of anhydrous pyridine and deuterated chloroform (1.6:1, v/v) under stirring. This was followed by the addition 100  $\mu$ L of cyclohexanol (10.85 mg/mL in anhydrous pyridine and deuterated chloroform 1.6:1, v/v) as an internal standard and 100  $\mu$ L of Chromium (III) acetylacetonate solution (5 mg mL<sup>-1</sup> in anhydrous pyridine and deuterated chloroform 1.6:1, v/v) as relaxation reagent. The mixture was reacted with 100  $\mu$ L of phosphitylating reagent (2-chloro-4,4,5,5-tetramethyl-1,3,2-dioxaphospholane, TMDP) for about 10 min and was transferred into a 5 mm NMR tube for subsequent NMR analysis.

### **Reference**

- 1 M. Sette, R. Wechselberger and C. Crestini. *Chem-Eur.* 2011,**17**,9529-9535.
- 2 J.-L. Wen, S.-L. Sun, B.-L. Xue and R.-C. Sun. *Materials.* 2013,**6**,359-391.
